# Supplementary material for: Rfx2 Stabilizes Foxj1 Binding at Chromatin Loops to Enable Multiciliated Cell Gene Expression
Source: PLoS Genet. 2017 Jan 19;13(1):e1006538. doi: 10.1371/journal.pgen.1006538 (PMC5245798; doi:10.1371/journal.pgen.1006538)
Supplement: S5 Table — Listed is a group of genes clustered by similarity of expression as determined in S3 Fig. (XLSX) [file pgen.1006538.s024.xlsx]

## Sheet: Sheet1
LRP2	ENSG00000081479	c.Taira201203testis_X001603	JGIv7b.000043242_7285838-7393816+
NES	ENSG00000132688	c.Taira201203heart_X002373	JGIv7b.000026819_2062720-2085558+
OTX2	ENSG00000165588	c.JGIL6RMv1_XeXenL6RMv10025952m	JGIv7b.000039723_9163473-9172981+
OTX2	ENSG00000165588	c.UniGene_Xl_S22245695	JGIv7b.000050079_2769673-2781629-
PRDM1	ENSG00000057657	c.Audic201207_X005076	JGIv7b.000008630_3735898-3752767+
HLA-DQB1	ENSG00000231286	c.Taira201203eye_X006760	JGIv7b.000050694_7228227-7245658-
RAB3IL1	ENSG00000167994	c.Ueno201210brain_X002710	JGIv7b.000183929_2797064-2820889-
HIST1H2BM	ENSG00000196374	c.JGIL6RMv1_XeXenL6RMv10049131m	JGIv7b.000021603_4449814-4454555+
ERAP1	ENSG00000164307	c.Ueno201210st10_X000036	JGIv7b.000001187_3663723-3710562+
POU3F2	ENSG00000184486	c.TXGP201107_X003472	JGIv7b.000037448_486318-492292-
UNC93A	ENSG00000112494	c.Taira201203st12_X003186	JGIv7b.000121003_1667720-1681146+
ZP4	ENSG00000116996	c.Chang2013_X030066	JGIv7b.000160841_3881902-3893892-
URGCP	ENSG00000106608	c.Taira201203ovary_X008285	JGIv7b.000362948_258524-274404+
ZP3	ENSG00000188372	c.JGIL6RMv1_XeXenL6RMv10051458m	JGIv7b.000113187_612684-621408+
BMP7	ENSG00000101144	c.Taira201203st10_X002472	JGIv7b.000059883_2758119-2812090+
LRRN1	ENSG00000175928	c.Audic201207_X039446	JGIv7b.000150991_1424526-1437495+
GPRC5C	ENSG00000170412	c.Taira201203kidney_X013921	JGIv7b.000402746_1345231-1435883+
CDO1	ENSG00000129596	c.Taira201203brain_X002633	JGIv7b.000012879_4133459-4156317+
CTDSPL2	ENSG00000137770	c.Chang2013_X013759	JGIv7b.000039437_2706838-2723776-
CUEDC2	ENSG00000107874	c.XGI_TC415821	JGIv7b.000016807_3485760-3503323-
NA	c.Ueno2012106cells_X001189	JGIv7b.000074488_933889-942818-
PKN1	ENSG00000123143	c.Taira201203brain_X014050	JGIv7b.000175133_727928-780658+
SLC6A14	ENSG00000087916	c.Audic201207_X023353	JGIv7b.000050694_1721548-1740748-
NA	c.JGIL6RMv1_XeXenL6RMv10055418m	JGIv7b.000075417_5512673-5517835-
MARCKSL1	ENSG00000175130	c.JGIL6RMv1_XeXenL6RMv10046146m	JGIv7b.000166674_3201078-3203227-
LRWD1	ENSG00000161036	c.Chang2013_X027032	JGIv7b.000112554_1921199-1946319+
NA	c.mgEST_1013088352	JGIv7b.000054653_299648-306527-
NA	c.TeperekTkacz201206_X000926	JGIv7b.000013265_2687798-2691196-
ZNF300	ENSG00000145908	c.Ueno2012102cells_X001271	JGIv7b.000109621_240470-260891+
EMX1	ENSG00000135638	c.Quigley201212_X014344	JGIv7b.000027038_130890-133875+
TRIM39	ENSG00000230308	c.UniGene_Xl_S14219872	JGIv7b.000074488_1497018-1508582+
LHX5	ENSG00000089116	c.JGIL6RMv1_XeXenL6RMv10006217m	JGIv7b.000229342_203987-226474-
POU5F1	ENSG00000229094	c.Chang2013_X013645	JGIv7b.000037448_494399-508009-
TDGF1	ENSG00000241186	c.JGIL6RMv1_XeXenL6RMv10048383m	JGIv7b.000013576_2484087-2488634-
PDGFB	ENSG00000100311	c.Quigley201212_X030415	JGIv7b.000078978_3403347-3420648-
ZNF484	ENSG00000127081	c.Taira201203brain_X000761	JGIv7b.000003552_48772-58158+
RASD1	ENSG00000108551	c.XGI_TC436259	JGIv7b.000074548_385682-388514-
PHYH	ENSG00000107537	c.Quigley201207_X008940	JGIv7b.000094770_11882-18043-
HS3ST1	ENSG00000002587	c.Audic201207_X049021	JGIv7b.000302805_1842714-1856319+
KLF2	ENSG00000127528	c.Taira201203brain_X016955	JGIv7b.000357348_471871-475471+
GATA5	ENSG00000130700	c.Amin201106_X004781	JGIv7b.000014557_1087053-1120045-
RGCC	ENSG00000102760	c.Taira201203st25_X000983	JGIv7b.000014978_7745525-7756248-
GATA4	ENSG00000136574	c.Taira201203heart_X000707	JGIv7b.000007103_2056743-2094324+
SKIL	ENSG00000136603	c.Taira201203st08_X003535	JGIv7b.000074750_83403-108794+
TBX20	ENSG00000164532	c.Amin201106_X020284	JGIv7b.000134022_511371-541759+
FOXI1	ENSG00000168269	c.Quigley201212_X000895	JGIv7b.000001168_1527034-1532904+
TAT	ENSG00000198650	c.Ismailoglu201203_X002586	JGIv7b.000016424_761232-793826-
PDGFRA	ENSG00000134853	c.Taira201203kidney_X004401	JGIv7b.000032657_1911538-1937775-
HIST2H2AB	ENSG00000184270	c.Taira201203st08_X004292	JGIv7b.000111824_6759269-6760107+
PRSS27	ENSG00000172382	c.Quigley201212_X036450	JGIv7b.000120274_79417-83786+
THNSL2	ENSG00000144115	c.Ismailoglu201203_X000394	JGIv7b.000003467_323800-341754+
SPRY2	ENSG00000136158	c.Ismailoglu201203_X011410	JGIv7b.000221007_977829-985672+
PMEPA1	ENSG00000124225	c.Taira201203eye_X002383	JGIv7b.000013471_2486157-2527620-
ZFP1	ENSG00000184517	c.Park201106_X023370	JGIv7b.000256924_38628-41588-
